# Supplementary material
Source: Springer Nature journal article supplement (https://www.springermedizin.de/resource/supplementary/12903_2008_121_MOESM2_ESM.pdf/9517364)
Supplement: MOESM2 [file 9517364]

Type 2 diabetic subjects with oral *C. albicans* colonisation

Type 2 diabetic subjects without oral *C. albicans* colonisation

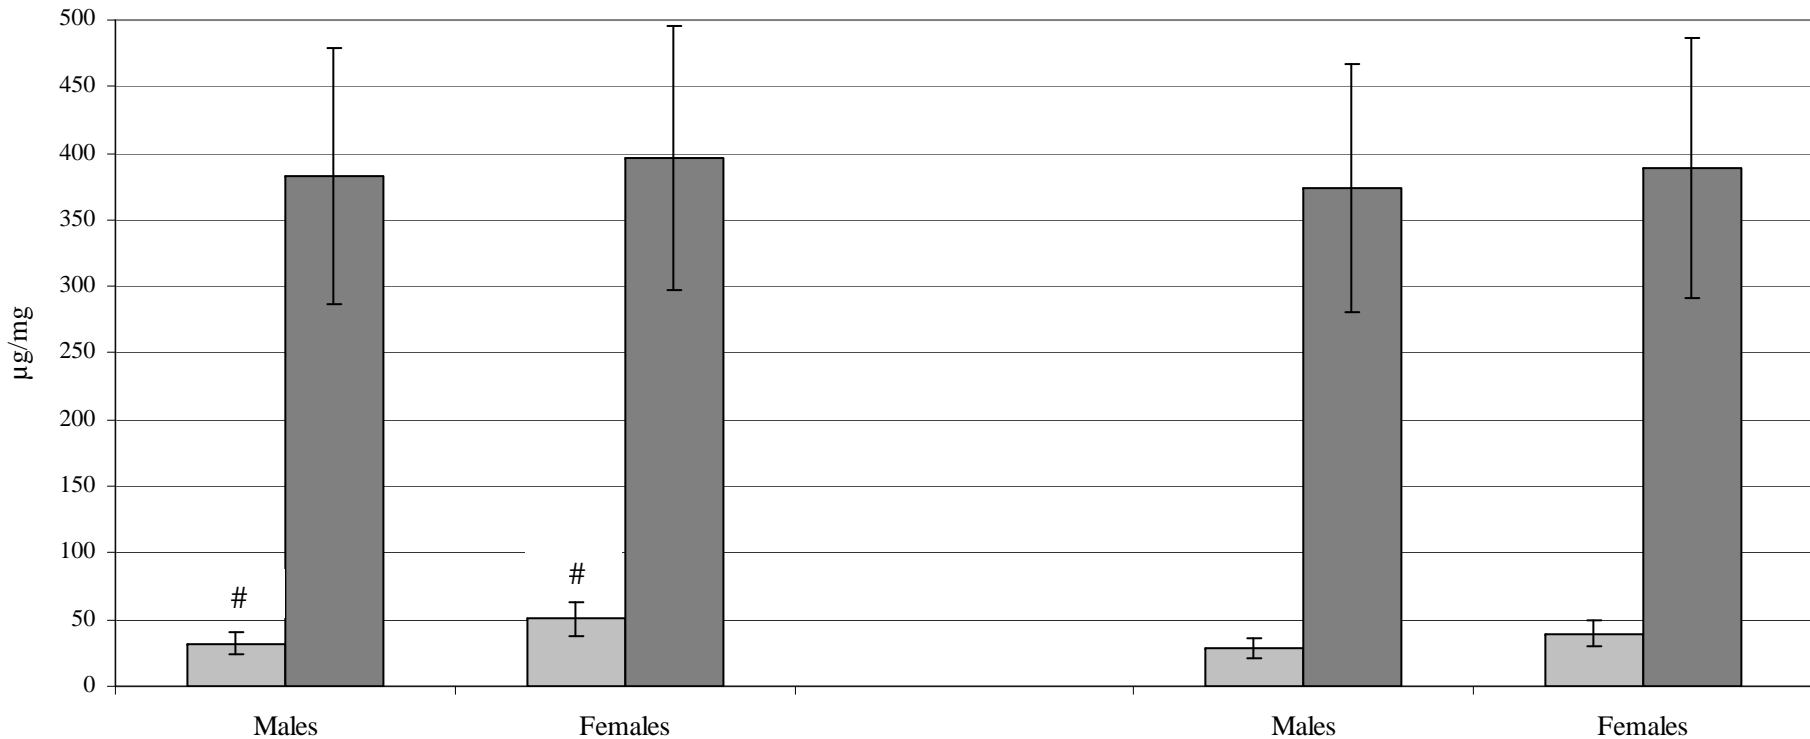

Salivary IgG ( $\mu\text{g}/\text{mg}$ ) protein concentration

Salivary IgA ( $\mu\text{g}/\text{mg}$ ) protein concentration
